# Supplementary material
Source: bioRxiv or medRxiv preprint supplement (https://www.biorxiv.org/highwire/filestream/20673/field_highwire_adjunct_files/0/074054-1.pdf)
Supplement: Supplementary file [file 074054-1.pdf]

## **Behavioural and Environmental Obesogenic Variables in the UK Biobank**

We selected 12 measures that predominantly represented diet and activity based measures previously studied in gene x BMI variant publications<sup>1-7</sup>. In addition we selected sun protection use as a negative control. The measures are described in more detail below:

### **Dietary information**

Participants completed a generic diet questionnaire during recruitment and a subset of 46,526 individuals completed up to five 24-hour food frequency questionnaires (FFQ). The FFQ focussed on the consumption of approximately 200 commonly consumed food and drinks (<http://biobank.ctsu.ox.ac.uk/crystal/refer.cgi?id=118240>). For each participant completing the food frequency questionnaire nutrient intakes were estimated by multiplying the quantity consumed by the nutrient composition of the food or beverage, as taken from the UK food composition database<sup>8</sup>. The 46,526 participants with genetic data completing at least one standard (i.e. normal diet) FFQ were included in this study.

#### **Fizzy drink and fried food intake**

Fizzy drink consumption was determined from the FFQ and represented number of glasses of fizzy drink consumed on an average day. Fried food intake was determined from the FFQ and combined the reported intake of fried chicken and fried potato.

#### **Percentage fat and protein**

Fat and protein (in grams) consumed were taken from the UK Biobank derived nutrients information in the FFQ. The variables were then divided by total energy intake (in KJ).

#### **Western diet**

The generic diet questionnaire was used to calculate the average consumption of fruit, vegetables, fish (oily and non-oily), meat (processed, poultry, beef, lamb and pork), cheese, milk, bread, cereal, tea, coffee and water. To condense this information we performed a principal component factor analysis. Seven eigenvalues were greater than 1, factor 1 was considered to represent a “Westernised” diet (this was higher in calories and processed foods), factor 2 representing a prudent diet and factor 3 representing a healthy diet. Here, the “Westernised” diet was investigated further. This information was available for 94,040 individuals of white origin with genetic data available.

## **Self-reported physical activity**

### International Physical Activity Questionnaire

The UK Biobank asked a range of questions about physical activity questions to all participants. We derived the total metabolic equivalent of task (MET) minutes of exercise per week (based on the International Physical Activity Questionnaire (IPAQ)) using the IPAQ guidelines<sup>9</sup>.

### Sedentary behaviour

The UK Biobank asked all participants about the hours per day they spent a) driving, b) using a computer and c) watching television. These three variables were summed to provide hours per day participants spent sat down. Values greater than 24 hours per day were excluded. Those reporting over 16 hours were recoded to 16 hours. Sedentary time was available for 119,688 individuals with genetic data available.

### TV watching

Participants in the UK Biobank were asked to report how many hours they spent watching TV in a typical day.

### Vigorous activity

Minutes spent undertaking vigorous activity each week was calculated. A dichotomous vigorous activity variable was also derived denoting participants who performed more than 1 hour of vigorous activity per week or not.

## **Measured physical activity with accelerometer data**

Daily accelerometer data were available for 19,229 individuals of White British origin with genetic data available for a period of 6 days. A variable was derived from this data representing the mean levels of moderate physical activity per day for each individual.

## **Composite score of the obesogenic environment and behaviour**

Physical activity (as measured by IPAQ), sedentary time, TV watching and westernised diet were available in 86,549 individuals with BMI genetic variants available. We did not use other variables as they were only available in smaller numbers. The obesogenic variables were combined using a principal components factor analysis in STATA. Only one factor had

an eigenvalue of greater than one and this was utilised as a composite score of the obesogenic environment.

### **Sun protection use**

All participants in the UK Biobank were asked "Do you wear sun protection (e.g. sunscreen lotion, hat) when you spend time outdoors in the summer?" with the options: Never, Sometimes, Most of the time, Always, Don't go out in the sun, Don't know and Prefer not to answer. We derived a binary variable comparing those who always or usually use sun protection to those who never or occasionally use sun protection.

All the variables were dichotomised (at the median for continuous variables) to investigate the mean BMI in these groups (Supplementary table 8) and interaction was investigated in the same way as for TDI (using continuous variables where possible in the interaction model). Additionally, the correlation of each variable with TDI was determined.

## Generating the simulated variable for TDI

In our analysis of gene x environment interactions for TDI the basic starting equation is as follows:

$$(y|C, g, e) = C.c + \alpha g + \beta e + \varepsilon \quad (1)$$

where  $y$  is BMI,  $e$  is the environmental variable (TDI),  $g$  is the BMI genetic risk score and  $C$  represents important covariates.

Since  $g$  is a genetic risk score for the trait  $y$ ,  $\alpha$  is non-zero but  $\beta$  can be zero. When statistical interaction is tested, the model is changed to

$$(y|C, g, e) = C.c + \alpha g + \beta e + \gamma(g * e) + \varepsilon \quad (2)$$

where  $g * e$  refers to the element-wise product of two vectors.

One of the major problems with testing the  $\gamma$  parameter in this model is that if the environmental factor  $e$  is correlated with  $y$  and  $g$  the test may yield spurious or biased interaction coefficients for example due to collider bias or biases well-established in secondary trait analysis.

In our simulation analysis rather than running model (2) alone we also perform the following:

$$(y|C, g, f) = C.c + \alpha g + \beta f + \gamma(g * f) + \tau \quad (3)$$

where  $f$  relates to  $y$ ,  $g$  and  $C$  marginally as does  $e$  and has the same conditional distribution. In other words we create an artificial environmental variable that behaves marginally exactly as the real environmental variable  $e$ .

In practice one can simulate  $f$  easily by regressing  $e$  on  $[C, g, y]$  and add the fitted values to a random permutation of the residuals. This ensures that  $f$  and  $e$  have the same conditional expectations and same residual distributions.

## **Sensitivity analyses to explore additional factors that could affect gene x obesogenic environment interactions**

### *Evidence of interaction when analysing BMI on the $\text{kgm}^{-2}$ scale*

Our primary analysis was based on forcing the outcome, BMI, into a normal distribution. We used an inverse normalised distribution because skewed distributions and different variances can inflate effect estimates due to heteroscedasticity. Previous studies have not necessarily accounted for heteroscedasticity. As expected, when analysed on the natural BMI scale ( $\text{kgm}^{-2}$ ), the evidence of interaction was stronger than when using BMI values on the inverse normalised scale, but this increase is likely partly artefactual due to the increased variance in BMI in the group living in more deprived areas (Supplementary Figure 3, Supplementary Table 10).

We next tested how the distribution of the environmental interaction term (here TDI) affected the evidence of interaction. Our primary results were based on Townsend deprivation index on its natural scale, which includes a slight right hand skew (Supplementary Figure 2). We therefore tested our results when TDI was inverse normalised. The evidence for interaction remained, with a larger effect of the BMI genetic risk score on BMI for individuals living in more deprived areas (0.025 standard deviations per allele [95%CI: 0.023-0.027]) compared to those in less deprived areas (0.022 [95%CI: 0.020-0.024]) (Table 2), although the statistical confidence was weaker  $P_{\text{interaction}} 7 \times 10^{-4}$  ( $P_{\text{interaction}} 8 \times 10^{-4}$ , using robust standard errors).

We next tested how splitting the sample into two groups with different environmental variability can introduce spurious GxE association. Gene environment interaction studies often stratify the population using a high threshold for the environmental variable. This dichotomisation can artificially reduce the environmental variance in one of the groups and hence seemingly increases the observed genetic effect in that stratum. This problem can be reduced by splitting the sample such that the environmental variability is equal in the two groups. We largely avoided this problem

by using a continuous variable as the interaction term but we also tested BMI genetic risk score – BMI associations by dichotomising TDI at different points. We observed similar levels of evidence of interaction when splitting people into a groups based on the 75% most deprived areas and 25% least deprived areas, and vice versa and when splitting 50:50 (Supplementary Table 11).

Finally, we confirmed that the evidence for interaction was similar in both sexes (Supplementary table 12). This analysis was important because the variance in BMI is wider in women, and our previous studies<sup>10</sup> show that BMI is likely to causally influence TDI in women to a greater extent than men.

**Supplementary Figure 1:** QQ plot showing the observed TDI-BMI genetic interaction p-values from the 69 SNPs against the expected p-values

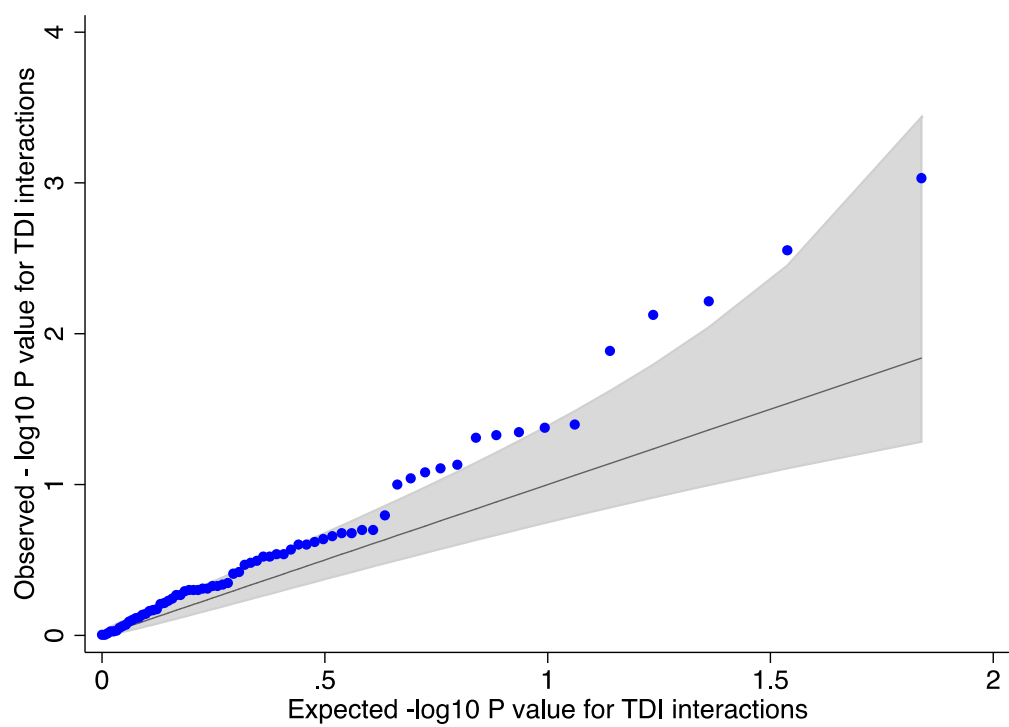

**Supplementary Figure 2:** Histogram showing the distribution of the Townsend Deprivation Index for the 119,464 individuals in the UK Biobank

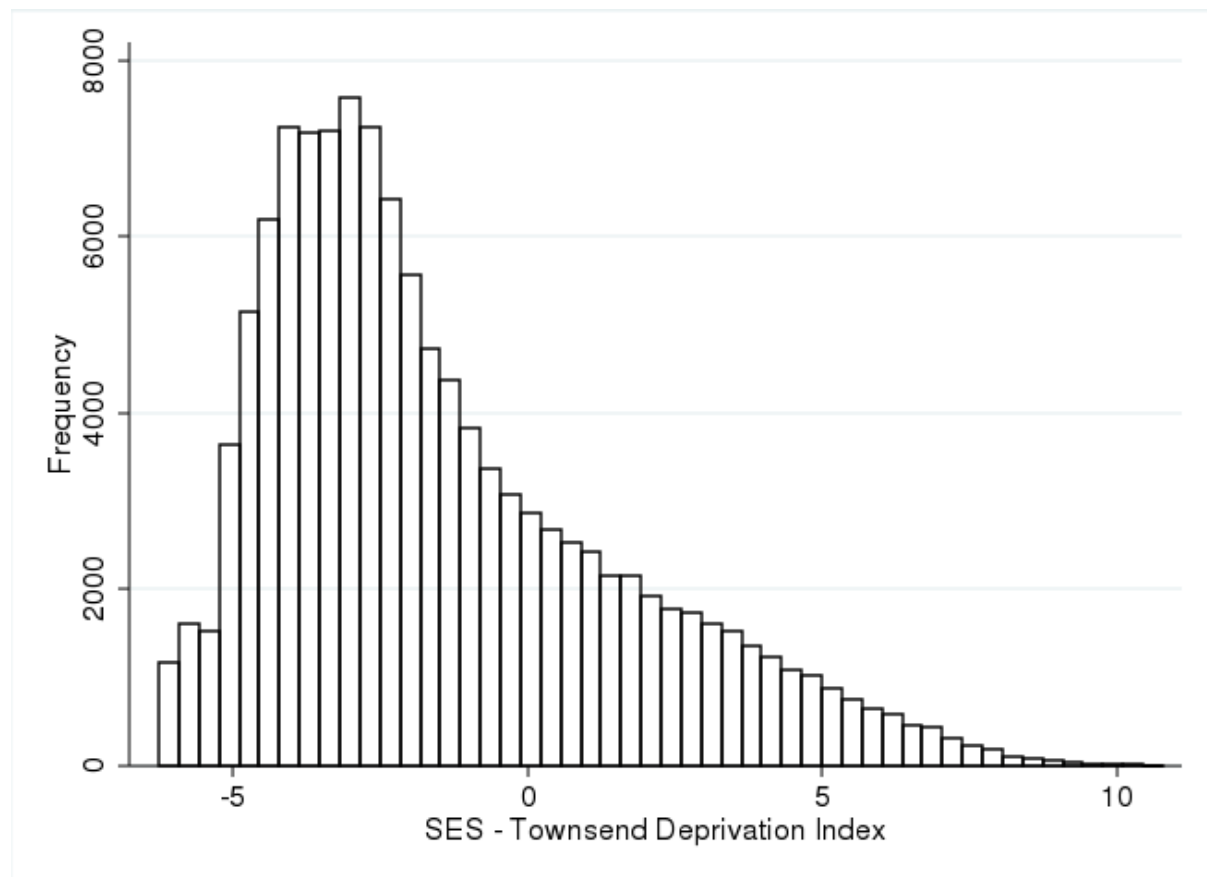



Supplementary Figure 3: Histograms representing the distribution of BMI in high SES and low SES groups. BMI represents raw BMI but effect sizes and p values are based on BMI adjusted for age, sex, ancestry principal components, assessment centre location and genotyping chip. BMI (INVERSE NORMAL) transforms the BMI residual variable to the inverse normal scale with a mean of zero and standard deviation of 1. The BMI GRS variance refers to the variance in BMI explained by the BMI genetic risk score of 69 variants weighted by their effects on BMI.

#### LOW RISK OBESOGENIC ENVIRONMENT – LOW DEPRIVATION

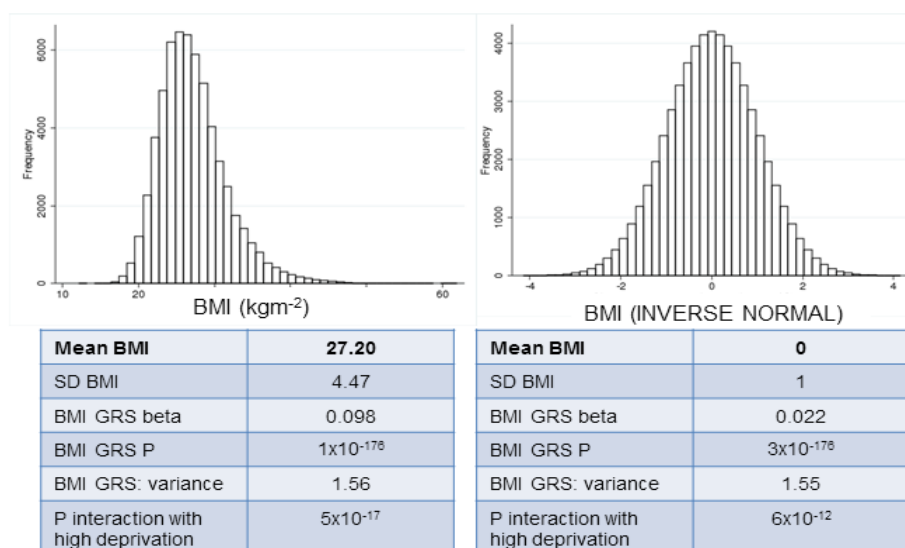

#### HIGH RISK OBESOGENIC ENVIRONMENT – HIGH DEPRIVATION

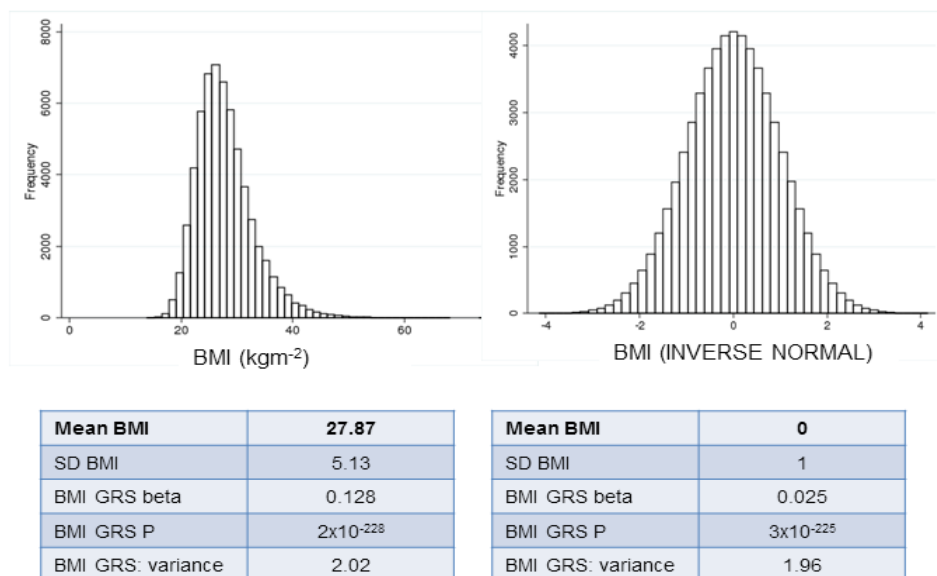

**Supplementary table 1:** Demographics of the 472,279 individuals in the UK Biobank of white origin with Townsend deprivation index available.

|                                      | Most deprived  | Least deprived | P*                   |
|--------------------------------------|----------------|----------------|----------------------|
| N                                    | 236,036        | 236,243        |                      |
| Mean age at recruitment (SD)         | 56.3 (8.2)     | 57.3 (7.9)     | $<1 \times 10^{-15}$ |
| Male, N (%)                          | 107,650 (45.6) | 107,408 (45.5) | 0.33                 |
| Mean Townsend deprivation index (SD) | 0.88 (2.52)    | -3.76 (0.94)   | $<1 \times 10^{-15}$ |
| Mean BMI (SD)                        | 27.7 (5.1)     | 27.1 (4.4)     | $<1 \times 10^{-15}$ |
| Obese, N (%)                         | 57,643 (24.4)  | 47,576 (20.1)  | $<1 \times 10^{-15}$ |
| Current smoker, N (%)                | 30,276 (12.8)  | 14,434 (6.1)   | $<1 \times 10^{-15}$ |
| Type 2 diabetes, N (%)               | 8,491 (3.6)    | 6,032 (2.6)    | $<1 \times 10^{-15}$ |
| Coronary artery disease, N (%)       | 12,370 (5.2)   | 8,934 (3.8)    | $<1 \times 10^{-15}$ |

**Supplementary Table 2:** Differences in BMI by BMI genetic risk score decile ( $\text{kgm}^2$ ) and by allele (inverse normalised scale) for a) Townsend deprivation index split at the median and b) Townsend deprivation index split at the UK average deprivation value. Interaction p-values are calculated using the binary TDI variable for both to enable comparison.

| Trait                                      | Obesogenic category           | N      | BMI (SD)        | BMI difference in 10% lowest genetic risk | BMI difference in 10% highest genetic risk | Per-allele Beta | SE    | P association        | P interaction*                       | P Interaction Robust**               |
|--------------------------------------------|-------------------------------|--------|-----------------|-------------------------------------------|--------------------------------------------|-----------------|-------|----------------------|--------------------------------------|--------------------------------------|
| Townsend Deprivation Index (natural scale) | High SES<br>TDI $\leq$ -2.294 | 59,872 | 27.20<br>(4.47) |                                           |                                            | 0.022           | 0.001 | $<1 \times 10^{-15}$ | <b><math>4 \times 10^{-6}</math></b> | <b><math>5 \times 10^{-6}</math></b> |
|                                            | Low SES<br>TDI $>$ -2.294     | 59,861 | 27.87<br>(5.13) | +0.35 $\text{kgm}^{-2}$                   | +0.92 $\text{kgm}^{-2}$                    | 0.025           | 0.001 | $<1 \times 10^{-15}$ |                                      |                                      |
| Townsend Deprivation Index (natural scale) | High SES                      | 84,526 | 27.30<br>(4.56) |                                           |                                            | 0.022           | 0.001 | $<1 \times 10^{-15}$ | <b><math>9 \times 10^{-9}</math></b> | <b><math>6 \times 10^{-8}</math></b> |
|                                            | Low SES                       | 35,357 | 28.11<br>(5.37) | +0.42 $\text{kgm}^{-2}$                   | +1.06 $\text{kgm}^{-2}$                    | 0.027           | 0.001 | $<1 \times 10^{-15}$ |                                      |                                      |

**Supplementary Table 3:** BMI genetic risk score association with BMI for different age groups in the UK Biobank. The interaction effect was then investigated for TDI in the three age groups and the P values for normal and robust models are presented.

| Age group | N     | Beta for BMI<br>GRS against<br>BMI | SE     | P                    | Variance<br>explained (%) | TDI<br>Pinteraction | TDI Pinteraction<br>robust |
|-----------|-------|------------------------------------|--------|----------------------|---------------------------|---------------------|----------------------------|
| 40-49     | 25658 | 0.028                              | 0.001  | $<1 \times 10^{-15}$ | 2                         | 9.00E-05            | 3.00E-04                   |
| 50-59     | 40131 | 0.025                              | 0.001  | $<1 \times 10^{-15}$ | 1.7                       | 3.00E-05            | 1.00E-04                   |
| 60-73     | 53944 | 0.020                              | 0.0008 | $<1 \times 10^{-15}$ | 1.2                       | 6.00E-04            | 1.00E-03                   |

**Supplementary table 4:** Individual SNP associations with BMI in high and low Townsend deprivation index groups

| SNP        | Obesogenic category | Beta   | SE    | P association       | P interaction      | P interaction robust |
|------------|---------------------|--------|-------|---------------------|--------------------|----------------------|
| rs1000940  | Low SES             | 0.001  | 0.006 | 0.90                | 0.10               | 0.13                 |
|            | High SES            | 0.020  | 0.006 | 0.002               |                    |                      |
| rs10132280 | Low SES             | 0.020  | 0.006 | 0.002               | 0.30               | 0.33                 |
|            | High SES            | 0.021  | 0.006 | $8 \times 10^{-4}$  |                    |                      |
| rs1016287  | Low SES             | 0.007  | 0.006 | 0.30                | $9 \times 10^{-4}$ | 0.002                |
|            | High SES            | 0.031  | 0.006 | $1 \times 10^{-6}$  |                    |                      |
| rs10182181 | Low SES             | 0.035  | 0.006 | $2 \times 10^{-9}$  | 0.50               | 0.53                 |
|            | High SES            | 0.032  | 0.006 | $3 \times 10^{-8}$  |                    |                      |
| rs10733682 | Low SES             | 0.021  | 0.006 | $4 \times 10^{-4}$  | 0.99               | 0.99                 |
|            | High SES            | 0.017  | 0.006 | 0.004               |                    |                      |
| rs10938397 | Low SES             | 0.024  | 0.006 | $4 \times 10^{-5}$  | 0.013              | 0.02                 |
|            | High SES            | 0.037  | 0.006 | $4 \times 10^{-10}$ |                    |                      |
| rs10968576 | Low SES             | 0.024  | 0.006 | $1 \times 10^{-4}$  | 0.49               | 0.51                 |
|            | High SES            | 0.024  | 0.006 | $1 \times 10^{-4}$  |                    |                      |
| rs11057405 | Low SES             | 0.031  | 0.009 | $8 \times 10^{-4}$  | 0.61               | 0.63                 |
|            | High SES            | 0.030  | 0.009 | 0.001               |                    |                      |
| rs11126666 | Low SES             | 0.001  | 0.007 | 0.93                | 0.89               | 0.90                 |
|            | High SES            | 0.004  | 0.007 | 0.53                |                    |                      |
| rs11165643 | Low SES             | 0.017  | 0.006 | 0.003               | 0.47               | 0.49                 |
|            | High SES            | 0.014  | 0.006 | 0.014               |                    |                      |
| rs11191560 | Low SES             | 0.037  | 0.011 | $6 \times 10^{-4}$  | 0.49               | 0.71                 |
|            | High SES            | 0.019  | 0.011 | 0.08                |                    |                      |
| rs11583200 | Low SES             | 0.020  | 0.006 | 0.001               | 0.54               | 0.56                 |
|            | High SES            | 0.017  | 0.006 | 0.005               |                    |                      |
| rs1167827  | Low SES             | 0.019  | 0.006 | 0.001               | 0.93               | 0.94                 |
|            | High SES            | 0.019  | 0.006 | $9 \times 10^{-4}$  |                    |                      |
| rs11688816 | Low SES             | 0.019  | 0.006 | 0.001               | 0.59               | 0.61                 |
|            | High SES            | 0.009  | 0.006 | 0.13                |                    |                      |
| rs11727676 | Low SES             | 0.001  | 0.010 | 0.95                | 0.50               | 0.52                 |
|            | High SES            | -0.008 | 0.010 | 0.41                |                    |                      |
| rs11847697 | Low SES             | 0.007  | 0.014 | 0.61                | 0.25               | 0.28                 |
|            | High SES            | 0.019  | 0.014 | 0.17                |                    |                      |
| rs12286929 | Low SES             | 0.011  | 0.006 | 0.07                | 0.94               | 0.95                 |
|            | High SES            | 0.010  | 0.006 | 0.10                |                    |                      |
| rs12401738 | Low SES             | 0.008  | 0.006 | 0.15                | 0.46               | 0.49                 |
|            | High SES            | 0.015  | 0.006 | 0.011               |                    |                      |
| rs12429545 | Low SES             | 0.029  | 0.009 | $9 \times 10^{-4}$  | 0.27               | 0.30                 |
|            | High SES            | 0.028  | 0.009 | 0.001               |                    |                      |
| rs12446632 | Low SES             | 0.029  | 0.008 | $5 \times 10^{-4}$  | 0.45               | 0.48                 |
|            | High SES            | 0.027  | 0.008 | 0.001               |                    |                      |
| rs12566985 | Low SES             | 0.012  | 0.006 | 0.044               | 0.21               | 0.24                 |
|            | High SES            | 0.010  | 0.006 | 0.08                |                    |                      |
| rs12885454 | Low SES             | 0.017  | 0.006 | 0.004               | 0.33               | 0.35                 |

|            |          |        |       |                     |       |       |
|------------|----------|--------|-------|---------------------|-------|-------|
|            | High SES | 0.014  | 0.006 | 0.017               |       |       |
|            | Low SES  | 0.021  | 0.006 | $3 \times 10^{-4}$  |       |       |
| rs12940622 | High SES | 0.013  | 0.006 | 0.024               | 0.72  | 0.74  |
|            | Low SES  | 0.049  | 0.008 | $1 \times 10^{-10}$ |       |       |
| rs13021737 | High SES | 0.067  | 0.008 | $6 \times 10^{-18}$ | 0.20  | 0.23  |
|            | Low SES  | 0.025  | 0.007 | $4 \times 10^{-4}$  |       |       |
| rs13078960 | High SES | 0.024  | 0.007 | 0.001               | 0.99  | 0.99  |
|            | Low SES  | 0.026  | 0.009 | 0.003               |       |       |
| rs13191362 | High SES | 0.023  | 0.009 | 0.008               | 0.39  | 0.43  |
|            | Low SES  | 0.034  | 0.008 | $5 \times 10^{-5}$  |       |       |
| rs1516725  | High SES | 0.029  | 0.008 | $7 \times 10^{-4}$  | 0.67  | 0.69  |
|            | Low SES  | 0.014  | 0.006 | 0.023               |       |       |
| rs1528435  | High SES | 0.014  | 0.006 | 0.015               | 0.29  | 0.32  |
|            | Low SES  | 0.072  | 0.006 | $5 \times 10^{-34}$ |       |       |
| rs1558902  | High SES | 0.081  | 0.006 | $3 \times 10^{-43}$ | 0.006 | 0.010 |
|            | Low SES  | 0.010  | 0.012 | 0.38                |       |       |
| rs16851483 | High SES | 0.045  | 0.012 | $1 \times 10^{-4}$  | 0.22  | 0.26  |
|            | Low SES  | 0.036  | 0.007 | $1 \times 10^{-7}$  |       |       |
| rs16951275 | High SES | 0.028  | 0.007 | $6 \times 10^{-5}$  | 0.23  | 0.26  |
|            | Low SES  | 0.055  | 0.018 | 0.003               |       |       |
| rs17024393 | High SES | 0.091  | 0.018 | $6 \times 10^{-7}$  | 0.091 | 0.11  |
|            | Low SES  | 0.012  | 0.007 | 0.09                |       |       |
| rs17094222 | High SES | 0.014  | 0.007 | 0.05                | 0.25  | 0.29  |
|            | Low SES  | 0.013  | 0.006 | 0.046               |       |       |
| rs17405819 | High SES | 0.018  | 0.006 | 0.05                | 0.47  | 0.50  |
|            | Low SES  | 0.017  | 0.007 | 0.011               |       |       |
| rs17724992 | High SES | 0.027  | 0.007 | $5 \times 10^{-5}$  | 0.68  | 0.70  |
|            | Low SES  | 0.019  | 0.006 | $9 \times 10^{-4}$  |       |       |
| rs1808579  | High SES | 0.023  | 0.006 | $9 \times 10^{-5}$  | 0.21  | 0.24  |
|            | Low SES  | 0.001  | 0.006 | 0.83                |       |       |
| rs1928295  | High SES | 0.018  | 0.006 | 0.002               | 0.24  | 0.27  |
|            | Low SES  | 0.011  | 0.007 | 0.11                |       |       |
| rs2033732  | High SES | -0.006 | 0.007 | 0.33                | 0.07  | 0.09  |
|            | Low SES  | 0.031  | 0.007 | $3 \times 10^{-6}$  |       |       |
| rs205262   | High SES | 0.025  | 0.007 | $1 \times 10^{-4}$  | 0.76  | 0.77  |
|            | Low SES  | 0.029  | 0.006 | $2 \times 10^{-6}$  |       |       |
| rs2112347  | High SES | 0.024  | 0.006 | $7 \times 10^{-5}$  | 0.54  | 0.57  |
|            | Low SES  | 0.009  | 0.009 | 0.33                |       |       |
| rs2121279  | High SES | 0.004  | 0.009 | 0.67                | 0.50  | 0.53  |
|            | Low SES  | 0.016  | 0.007 | 0.018               |       |       |
| rs2176598  | High SES | 0.028  | 0.007 | $2 \times 10^{-5}$  | 0.30  | 0.33  |
|            | Low SES  | 0.037  | 0.008 | $2 \times 10^{-6}$  |       |       |
| rs2207139  | High SES | 0.042  | 0.008 | $5 \times 10^{-8}$  | 0.38  | 0.41  |
|            | Low SES  | 0.028  | 0.008 | $3 \times 10^{-4}$  |       |       |
| rs2245368  | High SES | 0.016  | 0.008 | 0.046               | 0.57  | 0.60  |
|            | Low SES  | 0.028  | 0.008 | $2 \times 10^{-4}$  |       |       |
| rs2287019  | High SES | 0.041  | 0.008 | $5 \times 10^{-8}$  | 0.29  | 0.32  |
|            | Low SES  | 0.035  | 0.006 | $2 \times 10^{-9}$  |       |       |
| rs2365389  | Low SES  |        |       |                     | 0.94  | 0.95  |

|           |          |       |       |                     |       |       |
|-----------|----------|-------|-------|---------------------|-------|-------|
|           | High SES | 0.024 | 0.006 | $4 \times 10^{-5}$  |       |       |
|           | Low SES  | 0.020 | 0.006 | 0.002               |       |       |
| rs2650492 | High SES | 0.019 | 0.006 | 0.004               | 0.97  | 0.97  |
|           | Low SES  | 0.021 | 0.006 | $4 \times 10^{-4}$  |       |       |
| rs2820292 | High SES | 0.019 | 0.006 | 0.001               | 0.73  | 0.75  |
|           | Low SES  | 0.007 | 0.006 | 0.22                |       |       |
| rs29941   | High SES | 0.026 | 0.006 | $2 \times 10^{-5}$  | 0.049 | 0.06  |
|           | Low SES  | 0.023 | 0.006 | $1 \times 10^{-4}$  |       |       |
| rs3101336 | High SES | 0.031 | 0.006 | $1 \times 10^{-7}$  | 0.045 | 0.06  |
|           | Low SES  | 0.014 | 0.006 | 0.014               |       |       |
| rs3736485 | High SES | 0.008 | 0.006 | 0.18                | 0.08  | 0.10  |
|           | Low SES  | 0.026 | 0.006 | $3 \times 10^{-5}$  |       |       |
| rs3810291 | High SES | 0.029 | 0.006 | $2 \times 10^{-6}$  | 0.047 | 0.06  |
|           | Low SES  | 0.027 | 0.006 | $3 \times 10^{-6}$  |       |       |
| rs3817334 | High SES | 0.034 | 0.006 | $8 \times 10^{-9}$  | 0.040 | 0.06  |
|           | Low SES  | 0.004 | 0.006 | 0.50                |       |       |
| rs3849570 | High SES | 0.016 | 0.006 | 0.009               | 0.32  | 0.35  |
|           | Low SES  | 0.017 | 0.006 | 0.006               |       |       |
| rs4256980 | High SES | 0.024 | 0.006 | $6 \times 10^{-5}$  | 0.20  | 0.23  |
|           | Low SES  | 0.016 | 0.006 | 0.007               |       |       |
| rs4740619 | High SES | 0.016 | 0.006 | 0.007               | 0.81  | 0.82  |
|           | Low SES  | 0.040 | 0.007 | $2 \times 10^{-8}$  |       |       |
| rs543874  | High SES | 0.056 | 0.007 | $4 \times 10^{-15}$ | 0.008 | 0.013 |
|           | Low SES  | 0.000 | 0.006 | 0.99                |       |       |
| rs6477694 | High SES | 0.014 | 0.006 | 0.023               | 0.042 | 0.06  |
|           | Low SES  | 0.046 | 0.007 | $2 \times 10^{-11}$ |       |       |
| rs6567160 | High SES | 0.060 | 0.007 | $1 \times 10^{-18}$ | 0.003 | 0.005 |
|           | Low SES  | 0.017 | 0.006 | 0.005               |       |       |
| rs657452  | High SES | 0.012 | 0.006 | 0.048               | 0.79  | 0.80  |
|           | Low SES  | 0.008 | 0.006 | 0.16                |       |       |
| rs6804842 | High SES | 0.010 | 0.006 | 0.08                | 0.77  | 0.78  |
|           | Low SES  | 0.037 | 0.006 | $5 \times 10^{-10}$ |       |       |
| rs7138803 | High SES | 0.030 | 0.006 | $4 \times 10^{-7}$  | 0.85  | 0.86  |
|           | Low SES  | 0.023 | 0.006 | $9 \times 10^{-5}$  |       |       |
| rs7141420 | High SES | 0.014 | 0.006 | 0.019               | 0.34  | 0.37  |
|           | Low SES  | 0.023 | 0.008 | 0.002               |       |       |
| rs7243357 | High SES | 0.004 | 0.008 | 0.59                | 0.16  | 0.19  |
|           | Low SES  | 0.007 | 0.007 | 0.27                |       |       |
| rs758747  | High SES | 0.021 | 0.007 | 0.001               | 0.62  | 0.64  |
|           | Low SES  | 0.015 | 0.007 | 0.025               |       |       |
| rs7599312 | High SES | 0.024 | 0.007 | $3 \times 10^{-4}$  | 0.49  | 0.52  |
|           | Low SES  | 0.033 | 0.013 | 0.014               |       |       |
| rs7899106 | High SES | 0.015 | 0.013 | 0.27                | 0.87  | 0.88  |
|           | Low SES  | 0.015 | 0.006 | 0.020               |       |       |
| rs9400239 | High SES | 0.019 | 0.006 | 0.003               | 0.51  | 0.53  |
|           | Low SES  | 0.012 | 0.007 | 0.10                |       |       |
| rs9581854 | High SES | 0.016 | 0.008 | 0.029               | 0.08  | 0.10  |

---

**Supplementary table 5:** Differences in BMI by allele (inverse normalised scale) for TDI in the CoLaus Study, occupational status in the 1958 Birth Cohort and the UK Biobank and educational years in the UK Biobank

| Study             | Obesogenic category                 | N      | BMI (SD)     | Per-allele Beta | SE    | P association        | P interaction* | P Interaction Robust** |
|-------------------|-------------------------------------|--------|--------------|-----------------|-------|----------------------|----------------|------------------------|
| CoLaus            | High SES based on TDI               | 2,623  | 25.53 (4.33) | 0.030           | 0.004 | $6 \times 10^{-15}$  | 0.35           | 0.34                   |
|                   | Low SES based on TDI                | 2,614  | 26.18 (4.78) | 0.022           | 0.004 | $1 \times 10^{-8}$   |                |                        |
| UK Biobank        | High job class                      | 38,942 | 27.15 (4.57) | 0.025           | 0.001 | $<1 \times 10^{-15}$ | 0.78           | 0.79                   |
|                   | Low job class                       | 37,374 | 27.68 (4.89) | 0.024           | 0.001 | $<1 \times 10^{-15}$ |                |                        |
| 1958 Birth Cohort | High job class                      | 2,873  | 27.17 (4.55) | 0.026           | 0.003 | $2 \times 10^{-14}$  | 0.62           | 0.62                   |
|                   | Low job class                       | 3,298  | 27.55 (5.10) | 0.024           | 0.003 | $1 \times 10^{-12}$  |                |                        |
| UK Biobank        | High educational years (19-20)      | 55,203 | 27.15 (4.67) | 0.024           | 0.001 | $<1 \times 10^{-15}$ | 0.76           | 0.76                   |
|                   | Low educational years ( $\leq 15$ ) | 63,572 | 27.86 (4.93) | 0.023           | 0.001 | $<1 \times 10^{-15}$ |                |                        |

BMI adjusted for age, sex, ancestral principal components and assessment centre location. Models additionally adjusted for genotyping platform

\* Interaction p-value

\*\* Interaction p-value accounting for heteroscedasticity using robust standard errors



**Supplementary Table 6: Interaction p-values for the 10 self-reported obesogenic variables, measured physical activity and sun protection use.**

| Trait                       | Obesogenic category        | P interaction* | Adjusted P interaction ** |
|-----------------------------|----------------------------|----------------|---------------------------|
| Fizzy drink                 | None daily                 | 0.86           | 0.95                      |
|                             | ≥1 glass daily             |                |                           |
| Fried food consumption      | None daily                 | 0.94           | 0.98                      |
|                             | ≥1 meal daily              |                |                           |
| Percentage fat^             | Low risk                   | 0.59           | 0.63                      |
|                             | High risk                  |                |                           |
| Percentage protein^         | Low risk                   | 0.79           | 0.98                      |
|                             | High risk                  |                |                           |
| Western diet^               | Low risk                   | 0.07           | <b>0.032</b>              |
|                             | High risk                  |                |                           |
| IPAQ                        | >1845 MET minutes per week | <b>5E-6</b>    | <b>3E-5</b>               |
|                             | ≤1845 MET minutes per week |                |                           |
| Measured physical activity^ | High activity              | 0.11           | 0.15                      |
|                             | Low activity               |                |                           |
| Sedentary time              | <5 hours daily             | <b>0.030</b>   | 0.08                      |
|                             | ≥5 hours daily             |                |                           |
| TV watching                 | <4 hours daily             | <b>7E-5</b>    | <b>2E-5</b>               |
|                             | ≥4 hours daily             |                |                           |
| Vigorous activity           | >1 hour weekly             | 0.10           | 0.16                      |
|                             | ≤1 hour weekly             |                |                           |
| Composite score^            | Low risk                   | <b>2E-4</b>    | <b>6E-4</b>               |
|                             | High risk                  |                |                           |
| Sun protection use          | Usually or always use      | <b>1E-4</b>    | <b>3E-4</b>               |
|                             | Never or sometimes use     |                |                           |

\*Robust standard errors utilised to calculate the interaction p-value

\*\*Model includes adjustment for the TDI interaction and robust standard errors

**Supplementary table 7:** Association of Townsend deprivation index with a range of obesogenic variables. Negative values represent less deprivation.

| <b>Obesogenic environment variable</b>        | <b>Beta (95% CI) representing SD change in Townsend deprivation index per unit change in the obesogenic environment variable</b> | <b>P</b>              |
|-----------------------------------------------|----------------------------------------------------------------------------------------------------------------------------------|-----------------------|
| Dietary factors                               |                                                                                                                                  |                       |
| Fat in diet                                   | 0.16 (0.11, 0.21)                                                                                                                | $2 \times 10^{-11}$   |
| Fizzy drinks                                  | 0.036 (0.019, 0.054)                                                                                                             | $7 \times 10^{-5}$    |
| Fried food                                    | 0.021 (0.006, 0.036)                                                                                                             | 0.007                 |
| Protein in diet                               | -0.15 (-0.19, -0.11)                                                                                                             | $1 \times 10^{-13}$   |
| Westernised diet*                             | -0.033 (-0.040, -0.027)                                                                                                          | $< 1 \times 10^{-15}$ |
| Activity measures                             |                                                                                                                                  |                       |
| Measured activity*                            | -0.065 (-0.078, -0.051)                                                                                                          | $< 1 \times 10^{-15}$ |
| Physical activity (IPAQ)*                     | 0.006 (0.000, 0.012)                                                                                                             | 0.043                 |
| Sedentary time per day (hours)*               | 0.028 (0.022, 0.034)                                                                                                             | $< 1 \times 10^{-15}$ |
| TV per day (hours)*                           | 0.119 (0.113, 0.125)                                                                                                             | $< 1 \times 10^{-15}$ |
| Less than one hour vigorous activity per week | 0.077 (0.064, 0.089)                                                                                                             | $< 1 \times 10^{-15}$ |
| Other factors                                 |                                                                                                                                  |                       |
| Composite score*                              | 0.020 (0.014, 0.026)                                                                                                             | $6 \times 10^{-11}$   |
| More frequent sun protection use              | -0.080 (-0.087, -0.074)                                                                                                          | $< 1 \times 10^{-15}$ |

\*Continuous obesogenic variables single inverse normalised

**Supplementary Table 8: Comparison of the high and low risk categories for a range of self-reported obesogenic environmental/behavioural measures, measured physical activity, sun protection use and the composite score.**

| Environmental factor        | Obesogenic category        | N      | Male, N (%)   | Mean BMI | SD BMI | Effect size (95%CI) representing change in BMI (kg/m <sup>2</sup> ) for people in high risk group compared to the low risk group <sup>a</sup> | P       |
|-----------------------------|----------------------------|--------|---------------|----------|--------|-----------------------------------------------------------------------------------------------------------------------------------------------|---------|
| Fizzy drink                 | None daily                 | 39,975 | 18,327 (45.9) | 26.93    | 4.62   | Reference                                                                                                                                     | <1E-15  |
|                             | ≥1 glass daily             | 6,393  | 3,537 (55.3)  | 27.69    | 4.91   | 0.71 (0.58, 0.83)                                                                                                                             |         |
| Fried food intake           | None daily                 | 31,821 | 14,485 (45.5) | 26.96    | 4.66   | Reference                                                                                                                                     | 0.00002 |
|                             | ≥1 meal daily              | 14,547 | 7,379 (50.7)  | 27.20    | 4.68   | 0.20 (0.10, 0.29)                                                                                                                             |         |
| Percentage fat*             | Low risk                   | 23,194 | 11,080 (47.8) | 26.91    | 4.46   | Reference                                                                                                                                     | 1E-10   |
|                             | High risk                  | 23,174 | 10,784 (46.5) | 27.16    | 4.86   | 0.28 (0.19, 0.36)                                                                                                                             |         |
| Percentage protein*         | Low risk                   | 23,188 | 12,137 (52.3) | 26.70    | 4.54   | Reference                                                                                                                                     | <1E-15  |
|                             | High risk                  | 23,180 | 9,727 (42.0)  | 27.37    | 4.77   | 0.77 (0.68, 0.85)                                                                                                                             |         |
| Western diet*               | Low risk                   | 47,027 | 19,783 (42.1) | 27.06    | 4.71   | Reference                                                                                                                                     | <1E-15  |
|                             | High risk                  | 47,013 | 24,853 (52.9) | 28.00    | 4.79   | 0.86 (0.80, 0.92)                                                                                                                             |         |
| IPAQ                        | >1845 MET minutes per week | 54,573 | 27,217 (49.9) | 26.86    | 4.31   | Reference                                                                                                                                     | <1E-15  |
|                             | ≤1845 MET minutes per week | 54,569 | 25,111 (46.0) | 27.93    | 4.99   | 1.11 (1.06, 1.17)                                                                                                                             |         |
| Measured physical activity* | High activity              | 9,636  | 4,038 (41.9)  | 25.79    | 3.92   | Reference                                                                                                                                     | <1E-15  |
|                             | Low activity               | 9,636  | 4,777 (49.6)  | 27.79    | 4.92   | 1.95 (1.83, 2.09)                                                                                                                             |         |
| Sedentary time              | <5 hours daily             | 63,343 | 25,281 (39.9) | 26.61    | 4.47   | Reference                                                                                                                                     | <1E-15  |
|                             | ≥5 hours daily             | 56,345 | 31,387 (55.7) | 28.56    | 4.99   | 1.84 (1.78, 1.89)                                                                                                                             |         |
| TV                          | <4 hours daily             | 82,022 | 38,866 (47.4) | 26.98    | 4.54   | Reference                                                                                                                                     | <1E-15  |
|                             | ≥4 hours daily             | 36,814 | 17,496 (47.5) | 28.70    | 5.16   | 1.69 (1.63, 1.75)                                                                                                                             |         |
| Vigorous activity           | >1 hour weekly             | 35,183 | 18,637 (53.0) | 26.80    | 4.24   | Reference                                                                                                                                     | <1E-15  |
|                             | ≤1 hour weekly             | 74,004 | 33,710 (45.6) | 27.68    | 4.87   | 0.92 (0.86, 0.98)                                                                                                                             |         |
| Sun protection use          | Usually or always use      | 68,507 | 25,641 (37.4) | 27.32    | 4.75   | Reference                                                                                                                                     | <1E-15  |
|                             | Never or sometimes use     | 50,561 | 30,743 (60.8) | 27.81    | 4.89   | 0.31 (0.25, 0.37)                                                                                                                             |         |

|                  |           |        |               |       |      |                   |        |
|------------------|-----------|--------|---------------|-------|------|-------------------|--------|
| Composite score* | Low risk  | 43,275 | 19,768 (45.7) | 26.33 | 4.13 | Reference         |        |
|                  | High risk | 43,274 | 21,933 (50.7) | 28.46 | 4.87 | 2.08 (2.02, 2.14) | <1E-15 |

^ Adjusted for age, sex and ancestry principal components; \* high and low risk taken from median values

**Supplementary table 9:** Summary of the body mass index (BMI) variants previously identified as associated with those traits at genome wide significance

| Trait | Genetic variant | Locus           | Exclude from score | Reason for exclusion                                                                                                    | Trait raising allele | Trait lowering allele | Directly genotyped or Imputed | Imputation quality | Beta representing SD change in BMI or height for each SNP in UK Biobank data | P value  |
|-------|-----------------|-----------------|--------------------|-------------------------------------------------------------------------------------------------------------------------|----------------------|-----------------------|-------------------------------|--------------------|------------------------------------------------------------------------------|----------|
| BMI   | rs 1000940      | <i>RABEP1</i>   | No                 | NA                                                                                                                      | G                    | A                     | Imputed                       | 0.99624            | 0.011 (0.004)                                                                | 1.60E-02 |
| BMI   | rs 10132280     | <i>STXBP6</i>   | No                 | NA                                                                                                                      | C                    | A                     | Imputed                       | 0.97496            | 0.020 (0.005)                                                                | 1.10E-05 |
| BMI   | rs 1016287      | <i>FLJ30838</i> | No                 | NA                                                                                                                      | T                    | C                     | Imputed                       | 0.99411            | 0.019 (0.004)                                                                | 2.00E-05 |
| BMI   | rs 10182181     | <i>ADCY3</i>    | No                 | NA                                                                                                                      | G                    | A                     | Imputed                       | 0.99521            | 0.033 (0.004)                                                                | 1.40E-15 |
| BMI   | rs 10733682     | <i>LMX1B</i>    | No                 | NA                                                                                                                      | A                    | G                     | Imputed                       | 0.9576             | 0.019 (0.004)                                                                | 5.90E-06 |
| BMI   | rs 10938397     | <i>GNPDA2</i>   | No                 | NA                                                                                                                      | G                    | A                     | Imputed                       | 1                  | 0.030 (0.004)                                                                | 5.80E-13 |
| BMI   | rs 10968576     | <i>LINGO2</i>   | No                 | NA                                                                                                                      | G                    | A                     | Imputed                       | 1                  | 0.024 (0.004)                                                                | 6.90E-08 |
| BMI   | rs 11030104     | <i>BDNF</i>     | Yes                | BMI-raising allele also associated with regular smoking (which itself has a causal effect on BMI in opposite direction) | A                    | G                     | Imputed                       | 0.99931            | NA                                                                           | NA       |

|     |            |               |    |    |   |   |         |         |                   |          |
|-----|------------|---------------|----|----|---|---|---------|---------|-------------------|----------|
| BMI | rs11057405 | <i>CLIP1</i>  | No | NA | G | A | Imputed | 1       | 0.030<br>(0.007)  | 4.70E-06 |
| BMI | rs11126666 | <i>KCNK3</i>  | No | NA | A | G | Imputed | 0.99485 | 0.002<br>(0.005)  | 7.10E-01 |
| BMI | rs11165643 | <i>PTBP2</i>  | No | NA | T | C | Imputed | 0.99575 | 0.016<br>(0.004)  | 9.50E-05 |
| BMI | rs11191560 | <i>NT5C2</i>  | No | NA | C | T | Imputed | 0.99989 | 0.026<br>(0.008)  | 6.50E-04 |
| BMI | rs11583200 | <i>ELAVL4</i> | No | NA | C | T | Imputed | 0.98728 | 0.019<br>(0.004)  | 7.70E-06 |
| BMI | rs1167827  | <i>HIP1</i>   | No | NA | G | A | Imputed | 1       | 0.020<br>(0.004)  | 1.80E-06 |
| BMI | rs11688816 | <i>EHBP1</i>  | No | NA | G | A | Imputed | 0.98096 | 0.014<br>(0.004)  | 9.40E-04 |
| BMI | rs11727676 | <i>HHIP</i>   | No | NA | T | C | Imputed | 1       | -0.003<br>(0.007) | 6.60E-01 |
| BMI | rs11847697 | <i>PRKD1</i>  | No | NA | T | C | Imputed | 1       | 0.014<br>(0.010)  | 1.70E-01 |
| BMI | rs12286929 | <i>CADM1</i>  | No | NA | G | A | Imputed | 0.99124 | 0.010<br>(0.004)  | 1.20E-02 |
| BMI | rs12401738 | <i>FUBP1</i>  | No | NA | A | G | Imputed | 0.99528 | 0.012<br>(0.004)  | 3.30E-03 |
| BMI | rs12429545 | <i>OLFM4</i>  | No | NA | A | G | Imputed | 0.97759 | 0.027<br>(0.006)  | 8.00E-06 |
| BMI | rs12446632 | <i>GPRC5B</i> | No | NA | G | A | Imputed | 0.99978 | 0.028<br>(0.006)  | 2.40E-06 |

|     |             |                    |     |                                                                                                                                                                                                                                                                                    |   |   |         |         |                  |          |
|-----|-------------|--------------------|-----|------------------------------------------------------------------------------------------------------------------------------------------------------------------------------------------------------------------------------------------------------------------------------------|---|---|---------|---------|------------------|----------|
| BMI | rs 12566985 | <i>FPGT-TNNI3K</i> | No  | NA                                                                                                                                                                                                                                                                                 | G | A | Imputed | 0.9947  | 0.011<br>(0.004) | 6.10E-03 |
| BMI | rs 12885454 | <i>PRKDI</i>       | No  | NA                                                                                                                                                                                                                                                                                 | C | A | Imputed | 0.99569 | 0.015<br>(0.004) | 4.60E-04 |
| BMI | rs 12940622 | <i>RPTOR</i>       | No  | NA                                                                                                                                                                                                                                                                                 | G | A | Imputed | 0.99796 | 0.017<br>(0.004) | 5.90E-05 |
| BMI | rs 13021737 | <i>TMEM18</i>      | No  | NA                                                                                                                                                                                                                                                                                 | G | A | Imputed | 0.99072 | 0.059<br>(0.005) | 9.10E-27 |
| BMI | rs 13078960 | <i>CADM2</i>       | No  | NA                                                                                                                                                                                                                                                                                 | G | T | Imputed | 0.9915  | 0.024<br>(0.005) | 2.50E-06 |
| BMI | rs 13107325 | <i>SLC39A8</i>     | Yes | Missense Ala/Thr polymorphism located in exon 7 of SLC39A8, which encodes a zinc transporter that also transports cadmium and manganese. It is also associated with BP and HDL levels, and presumably these and the BMI effect are secondary to the metal ion transport variation. | T | C | Imputed | 1       | NA               | NA       |
| BMI | rs 13191362 | <i>PARK2</i>       | No  | NA                                                                                                                                                                                                                                                                                 | A | G | Imputed | 0.98973 | 0.026<br>(0.006) | 3.10E-05 |
| BMI | rs 1516725  | <i>ETV5</i>        | No  | NA                                                                                                                                                                                                                                                                                 | C | T | Imputed | 0.99495 | 0.032<br>(0.006) | 1.00E-07 |
| BMI | rs 1528435  | <i>UBE2E3</i>      | No  | NA                                                                                                                                                                                                                                                                                 | T | C | Imputed | 0.99738 | 0.014<br>(0.004) | 6.60E-04 |

|     |             |                 |     |                                       |   |   |         |         |                  |          |
|-----|-------------|-----------------|-----|---------------------------------------|---|---|---------|---------|------------------|----------|
| BMI | rs 1558902  | <i>FTO</i>      | No  | NA                                    | A | T | Imputed | 0.99914 | 0.077<br>(0.004) | 1.50E-75 |
| BMI | rs 16851483 | <i>RASA2</i>    | No  | NA                                    | T | G | Imputed | 0.99906 | 0.028<br>(0.008) | 6.80E-04 |
| BMI | rs 16951275 | <i>MAP2K5</i>   | No  | NA                                    | T | C | Imputed | 0.99819 | 0.032<br>(0.005) | 4.40E-11 |
| BMI | rs 17001654 | <i>SCARB2</i>   | Yes | SNP not in Hardy-Weinberg equilibrium | G | C | Imputed | 0.9483  | NA               | NA       |
| BMI | rs 17024393 | <i>GNAT2</i>    | No  | NA                                    | C | T | Imputed | 0.98934 | 0.074<br>(0.013) | 1.20E-08 |
| BMI | rs 17094222 | <i>HIF1AN</i>   | No  | NA                                    | C | T | Imputed | 0.96874 | 0.013<br>(0.005) | 8.50E-03 |
| BMI | rs 17405819 | <i>HNFB4G</i>   | No  | NA                                    | T | C | Imputed | 0.99793 | 0.014<br>(0.004) | 1.30E-03 |
| BMI | rs 17724992 | <i>PGPEP1</i>   | No  | NA                                    | A | G | Imputed | 0.98342 | 0.023<br>(0.005) | 1.10E-06 |
| BMI | rs 1808579  | <i>C18orf8</i>  | No  | NA                                    | C | T | Imputed | 0.99797 | 0.022<br>(0.004) | 1.50E-07 |
| BMI | rs 1928295  | <i>TLR4</i>     | No  | NA                                    | T | C | Imputed | 0.99998 | 0.010<br>(0.004) | 1.60E-02 |
| BMI | rs 2033529  | <i>TDRG1</i>    | Yes | SNP not available                     | G | A | NA      | NA      | NA               | NA       |
| BMI | rs 2033732  | <i>RALYL</i>    | No  | NA                                    | C | T | Imputed | 1       | 0.002<br>(0.005) | 6.70E-01 |
| BMI | rs 205262   | <i>C6orf106</i> | No  | NA                                    | G | A | Imputed | 0.9968  | 0.028<br>(0.005) | 1.10E-09 |
| BMI | rs 2075650  | <i>TOMM40</i>   | Yes | SNP not in Hardy-Weinberg equilibrium | A | G | Imputed | 0.9865  | NA               | NA       |



|     |           |                 |    |    |   |   |         |         |                  |          |
|-----|-----------|-----------------|----|----|---|---|---------|---------|------------------|----------|
| BMI | rs2112347 | <i>POC5</i>     | No | NA | T | G | Imputed | 1       | 0.026<br>(0.004) | 6.30E-10 |
| BMI | rs2121279 | <i>LRP1B</i>    | No | NA | T | C | Imputed | 0.98723 | 0.006<br>(0.006) | 3.70E-01 |
| BMI | rs2176598 | <i>HSD17B12</i> | No | NA | T | C | Imputed | 1       | 0.023<br>(0.005) | 1.30E-06 |
| BMI | rs2207139 | <i>TFAP2B</i>   | No | NA | G | A | Imputed | 0.9989  | 0.038<br>(0.005) | 1.80E-12 |
| BMI | rs2245368 | <i>PMS2L11</i>  | No | NA | C | T | Imputed | 1       | 0.022<br>(0.005) | 8.00E-05 |
| BMI | rs2287019 | <i>QPCTL</i>    | No | NA | C | T | Imputed | 0.97852 | 0.035<br>(0.005) | 1.00E-10 |
| BMI | rs2365389 | <i>FHIT</i>     | No | NA | C | T | Imputed | 0.99305 | 0.029<br>(0.004) | 2.70E-12 |
| BMI | rs2650492 | <i>SBK1</i>     | No | NA | A | G | Imputed | 0.98144 | 0.019<br>(0.005) | 3.60E-05 |
| BMI | rs2820292 | <i>NAV1</i>     | No | NA | C | A | Imputed | 1       | 0.019<br>(0.004) | 3.60E-06 |
| BMI | rs29941   | <i>KCTD15</i>   | No | NA | G | A | Imputed | 1       | 0.018<br>(0.004) | 5.00E-05 |
| BMI | rs3101336 | <i>NEGR1</i>    | No | NA | C | T | Imputed | 1       | 0.027<br>(0.004) | 9.50E-11 |
| BMI | rs3736485 | <i>DMXL2</i>    | No | NA | A | G | Imputed | 0.98728 | 0.011<br>(0.004) | 6.40E-03 |
| BMI | rs3810291 | <i>ZC3H4</i>    | No | NA | A | G | Imputed | 1       | 0.028<br>(0.004) | 1.80E-10 |

|     |           |                 |     |                                                                   |   |   |         |         |                  |          |
|-----|-----------|-----------------|-----|-------------------------------------------------------------------|---|---|---------|---------|------------------|----------|
| BMI | rs3817334 | <i>MTCH2</i>    | No  | NA                                                                | T | C | Imputed | 1       | 0.031<br>(0.004) | 1.40E-13 |
| BMI | rs3849570 | <i>GBE1</i>     | No  | NA                                                                | A | C | Imputed | 0.99509 | 0.011<br>(0.004) | 7.80E-03 |
| BMI | rs3888190 | <i>ATP2A1</i>   | Yes | Associated with lots of<br>other traits and is a big<br>haplotype | A | C | Imputed | 0.99808 | NA               | NA       |
| BMI | rs4256980 | <i>TRIM66</i>   | No  | NA                                                                | G | C | Imputed | 0.99283 | 0.021<br>(0.004) | 1.70E-06 |
| BMI | rs4740619 | <i>C9orf93</i>  | No  | NA                                                                | T | C | Imputed | 0.99762 | 0.017<br>(0.004) | 5.70E-05 |
| BMI | rs543874  | <i>SEC16B</i>   | No  | NA                                                                | G | A | Imputed | 1       | 0.049<br>(0.005) | 3.40E-22 |
| BMI | rs6477694 | <i>EPB41LAB</i> | No  | NA                                                                | C | T | Imputed | 0.99022 | 0.008<br>(0.004) | 6.70E-02 |
| BMI | rs6567160 | <i>MC4R</i>     | No  | NA                                                                | C | T | Imputed | 0.99663 | 0.054<br>(0.005) | 9.50E-29 |
| BMI | rs657452  | <i>AGBL4</i>    | No  | NA                                                                | A | G | Imputed | 0.98709 | 0.014<br>(0.004) | 8.40E-04 |
| BMI | rs6804842 | <i>RARB</i>     | No  | NA                                                                | G | A | Imputed | 0.98778 | 0.009<br>(0.004) | 3.20E-02 |
| BMI | rs7138803 | <i>BCDIN3D</i>  | No  | NA                                                                | A | G | Imputed | 1       | 0.034<br>(0.004) | 1.30E-15 |
| BMI | rs7141420 | <i>NRXN3</i>    | No  | NA                                                                | T | C | Imputed | 0.98379 | 0.019<br>(0.004) | 6.70E-06 |
| BMI | rs7243357 | <i>GRP</i>      | No  | NA                                                                | T | G | Imputed | 0.98998 | 0.012<br>(0.005) | 2.10E-02 |

|     |           |              |     |                                       |   |   |         |         |                  |          |
|-----|-----------|--------------|-----|---------------------------------------|---|---|---------|---------|------------------|----------|
| BMI | rs758747  | <i>NLRC3</i> | No  | NA                                    | T | C | Imputed | 0.97187 | 0.014<br>(0.005) | 2.00E-03 |
| BMI | rs7599312 | <i>ERBB4</i> | No  | NA                                    | G | A | Imputed | 0.97294 | 0.019<br>(0.005) | 3.60E-05 |
| BMI | rs7899106 | <i>GRID1</i> | No  | NA                                    | G | A | Imputed | 0.98612 | 0.023<br>(0.009) | 1.40E-02 |
| BMI | rs9400239 | <i>FOXO3</i> | No  | NA                                    | C | T | Imputed | 0.99206 | 0.017<br>(0.005) | 2.30E-04 |
| BMI | rs9581854 | <i>MTIF3</i> | No  | NA                                    | T | C | Imputed | 0.98643 | 0.015<br>(0.005) | 6.20E-03 |
| BMI | rs9925964 | <i>KAT8</i>  | Yes | SNP not in Hardy-Weinberg equilibrium | A | G | Imputed | 1       | NA               | NA       |

---

**Supplementary Table 10:** Change in BMI per allele increase in the BMI genetic risk score when BMI analysed on its natural (kgm<sup>-2</sup>) scale

| Trait                     | Obesogenic category        | N      | Beta  | SE    | P association        | P interaction*            | P Interaction Robust**    |
|---------------------------|----------------------------|--------|-------|-------|----------------------|---------------------------|---------------------------|
| Townsend Derivation Index | High SES TDI $\leq$ -2.295 | 59,872 | 0.097 | 0.003 | 4x10 <sup>-176</sup> | <b>5x10<sup>-17</sup></b> | <b>7x10<sup>-14</sup></b> |
|                           | Low SES TDI $>$ -2.295     | 59,861 | 0.128 | 0.004 | 7x10 <sup>-229</sup> |                           |                           |

BMI adjusted for age, sex, ancestral principal components and assessment centre location. Models additionally adjusted for genotyping platform

\* Interaction p-value

\*\* Interaction p-value accounting for heteroscedasticity using robust standard errors

**Supplementary table 11:** Change in BMI (single inverse normal scale) per allele increase in the BMI GRS when Townsend deprivation index was dichotomised at approximately 25% low risk, 75% high risk or 75% low risk and 25% high risk.

| Townsend Group                    | Obesogenic category | N      | Beta  | SE    | P association        | P interaction*     |
|-----------------------------------|---------------------|--------|-------|-------|----------------------|--------------------|
| 50% versus 50%                    | Low risk            | 59,928 | 0.022 | 0.001 | 3x10 <sup>-176</sup> | 6x10 <sup>-6</sup> |
|                                   | High risk           | 59,805 | 0.025 | 0.001 | 3x10 <sup>-225</sup> |                    |
| 25% low risk versus 75% high risk | Low risk            | 29,946 | 0.022 | 0.001 | 2x10 <sup>-86</sup>  | 4x10 <sup>-4</sup> |
|                                   | High risk           | 89,787 | 0.024 | 0.001 | <1x10 <sup>-15</sup> |                    |
| 75% low risk versus 25% high risk | Low risk            | 89,804 | 0.022 | 0.001 | 5x10 <sup>-268</sup> | 1x10 <sup>-8</sup> |
|                                   | High risk           | 29,929 | 0.027 | 0.001 | 7x10 <sup>-133</sup> |                    |

\* Interaction P-value calculated using the BMI GRS \* dichotomous variable. Presented p-values were calculated with robust standard errors

**Supplementary table 12:** Change in BMI (single inverse normal scale) per allele increase in the BMI GRS when Townsend deprivation index was dichotomised at the median in males and females separately.

| Townsend Group | Obesogenic category | N      | Beta  | SE    | P association        | P interaction*     |
|----------------|---------------------|--------|-------|-------|----------------------|--------------------|
| Males only     | Low risk            | 28,358 | 0.023 | 0.001 | $7 \times 10^{-91}$  | $3 \times 10^{-5}$ |
|                | High risk           | 28,331 | 0.025 | 0.001 | $2 \times 10^{-110}$ |                    |
| Females only   | Low risk            | 31,531 | 0.021 | 0.001 | $2 \times 10^{-87}$  | $2 \times 10^{-6}$ |
|                | High risk           | 31,513 | 0.025 | 0.001 | $1 \times 10^{-118}$ |                    |

## References

1. Ahmad S, Rukh G, Varga TV, et al. Gene x physical activity interactions in obesity: combined analysis of 111,421 individuals of European ancestry. *PLoS Genet.* 2013;9(7):e1003607.
2. Kilpelainen TO, Qi L, Brage S, et al. Physical activity attenuates the influence of FTO variants on obesity risk: a meta-analysis of 218,166 adults and 19,268 children. *PLoS Med.* Nov 2011;8(11):e1001116.
3. Li S, Zhao JH, Luan J, et al. Physical activity attenuates the genetic predisposition to obesity in 20,000 men and women from EPIC-Norfolk prospective population study. *PLoS Med.* 2010;7(8).
4. Qi Q, Chu AY, Kang JH, et al. Fried food consumption, genetic risk, and body mass index: gene-diet interaction analysis in three US cohort studies. *BMJ.* 2014;348:g1610.
5. Qi Q, Chu AY, Kang JH, et al. Sugar-sweetened beverages and genetic risk of obesity. *N Engl J Med.* Oct 11 2012;367(15):1387-1396.
6. Qi Q, Downer MK, Kilpelainen TO, et al. Dietary Intake, FTO Genetic Variants, and Adiposity: A Combined Analysis of Over 16,000 Children and Adolescents. *Diabetes.* Jul 2015;64(7):2467-2476.
7. Qi Q, Li Y, Chomistek AK, et al. Television watching, leisure time physical activity, and the genetic predisposition in relation to body mass index in women and men. *Circulation.* Oct 9 2012;126(15):1821-1827.
8. Agency FS. *McCance and Widdowson's The Composition of Foods, Sixth summary edition.* . Cambridge: Royal Society of Chemistry; 2002.
9. IPAQ. *Guidelines for Data Processing and Analysis of the International Physical Activity Questionnaire (IPAQ).* 2005.
10. Tyrrell J, Jones SE, Beaumont R, et al. Height, body mass index, and socioeconomic status: mendelian randomisation study in UK Biobank. *BMJ.* Mar 8 2016;352.
